# Supplementary material
Source: PubMed Central journal article supplement (PMC3958738)
Supplement: mmc1.pdf [file mmc1.pdf]

**Supplementary Table 1 Primary antibody used for immunocytochemistry**

| <b>Antibody name</b>                                  | <b>Company, catalog number</b> |
|-------------------------------------------------------|--------------------------------|
| Human Nanog Affinity Purified Polyclonal Ab, Goat IgG | R&D Systems, AF1977            |
| Oct-3/4 Antibody (C-10)                               | Santa Cruz, sc-5279            |
| Oct-3/4 Antibody (N-19)                               | Santa Cruz, sc-8628            |
| Sox-2 Antibody (H-65)                                 | Santa Cruz, sc-20088           |
| SSEA-4 Antibody (813-70)                              | Santa Cruz, sc-21704           |
| TRA-1-60 Antibody (TRA-1-60)                          | Santa Cruz, sc-21705           |
| Anti-TRA-1-81 Antibody, clone TRA-1-81                | Millipore, MAB4381             |
| Anti-Pax6 Antibody                                    | Millipore, MAB5552             |
| Polyclonal Rabbit Anti-Human Albumin/FITC             | Dako, F0117                    |

**Supplementary Table 2 Primer sequences used to detect mRNA expression**

| <b>Primer name</b>       | <b>Primer sequence</b>  |
|--------------------------|-------------------------|
| FGFR1 sense              | GAAGTTCAAATGCCCTTCCA    |
| FGFR1 antisense          | TCGATGTGCTTTAGCCACTG    |
| FGFR2 sense              | CCAAGAAGCCAGACTTCAGC    |
| FGFR2 antisense          | AACTCCCATTTTGGGTCCTC    |
| FGFR3 sense              | GTCCATGAGCTCCAACACG     |
| FGFR3 antisense          | CAGCATCTTCACAGCCACAG    |
| FGFR4 sense              | GGCCCCTGTATGTGATCGTA    |
| FGFR4 antisense          | GCCCAAAGTCAGCAATCTTC    |
| LIFR sense               | AGAGCAAGTTGTTGGGATGG    |
| LIFR antisense           | CACAGGAATGTCTTCCCATT    |
| gp130 sense              | AAGCCCAATCCACCACATAA    |
| gp130 antisense          | TGATCCCACCTTGCTTCTTCA   |
| NANOG sense              | TTCCTTCCTCCATGGATCTG    |
| NANOG antisense          | TCCTTGGCCAGTTGTTTTTC    |
| T sense                  | GCCCTACCCCAGCCCCTACACTC |
| T antisense              | CTCATGGGGAGCATGCTGGGATG |
| SOX17 sense              | GGGGACATGAAGGTGAAGGG    |
| SOX17 antisense          | GCCGGTACTTGTAGTTGGGG    |
| FOXA2 sense              | TGCACTCGGCTTCCAGTATG    |
| FOXA2 antisense          | ACGACATGTTTCATGGAGCCC   |
| EOMES sense              | TGAACGAGCCCTCAAAGACC    |
| EOMES antisense          | AGCGGGGTTGAGGTAAAGTG    |
| GATA6 sense              | AGGAATTCAAACCAGGAAACGA  |
| GATA6 antisense          | GGATTAGTGCTCTCTCCCGC    |
| CER1 sense               | GACCCAGTCCTTCATCCAGC    |
| CER1 antisense           | CATCCCAGCATGCTCCCCATGAG |
| ZNF521 sense             | CTGCCAAACTTCAGTGCCAC    |
| ZNF521 antisense         | GCACTAACTGCTGTGTTGGG    |
| MIXL1 sense              | CTGCTGGAGCTCGTCTTTTCG   |
| MIXL1 antisense          | CAGTTCCAGGAGCAGAGTGG    |
| $\beta$ -actin sense     | CCAACCGTGAGAAGATGACC    |
| $\beta$ -actin antisense | CAGAGGCGTACAAGGAAAGC    |

**Supplementary Table 3 Primary antibody used for Western blotting analysis**

| <b>Antibody name</b>                                                    | <b>Company, catalog number</b>   |
|-------------------------------------------------------------------------|----------------------------------|
| Phospho-Akt (Ser473) (D9E) XP® Rabbit mAb                               | Cell Signaling Technology, #4060 |
| Akt (pan) (40D4) Mouse mAb                                              | Cell Signaling Technology, #2920 |
| Phospho-p44/42 MAPK (Erk1/2) (Thr202/Tyr204) (D13.14.4E) XP® Rabbit mAb | Cell Signaling Technology, #4370 |
| p44/42 MAPK (Erk1/2) (L34F12) Mouse mAb                                 | Cell Signaling Technology, #4696 |
| p-Smad2/3 Antibody (Ser 423/425)                                        | Santa Cruz, sc-11769             |
| Smad2/3 (D7G7) XP® Rabbit mAb                                           | Cell Signaling Technology, #8685 |
| Phospho-Stat3 (Tyr705) (D3A7) XP® Rabbit mAb                            | Cell Signaling Technology, #9145 |
| Stat3 (124H6) Mouse mAb                                                 | Cell Signaling Technology, #9139 |
| Monoclonal Anti- $\alpha$ -Tubulin antibody produced in mouse           | SIGMA-ALDRICH, T5168             |

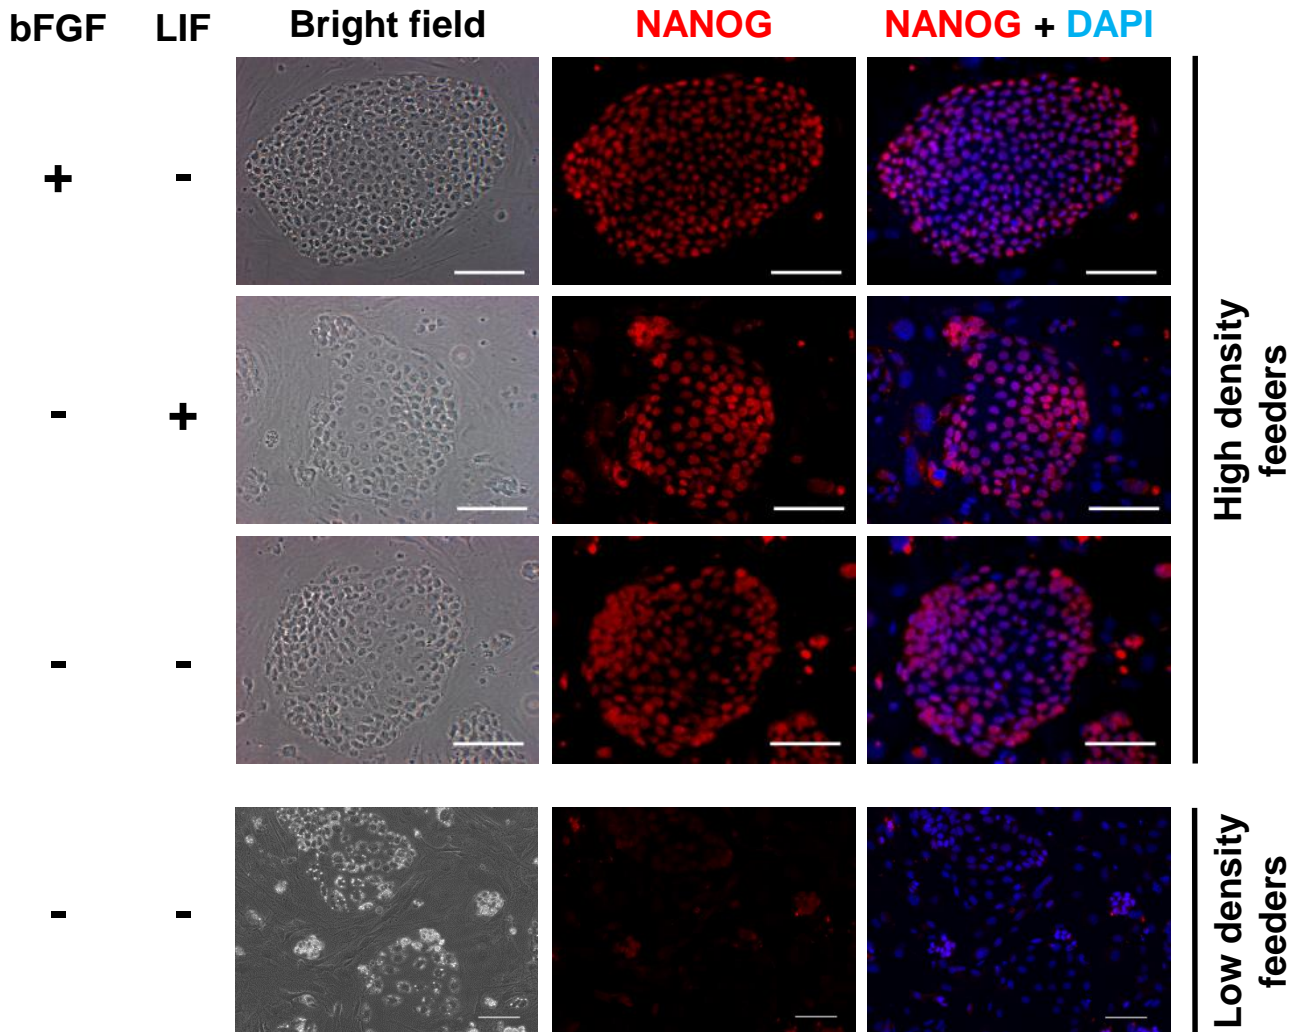

**Supplementary Fig. S1 Morphological and immunocytochemical analyses.**

CM ESCs (CM40) were cultured in the presence of the indicated growth factor (bFGF or LIF) on high-density feeder cells ( $3.5 \times 10^4$  cells/cm<sup>2</sup>) for more than ten passages or on low-density feeder cells ( $1.0 \times 10^4$  cells/cm<sup>2</sup>) for four passages. The cells were then fixed, stained, and analyzed by fluorescence microscopy. Bright field images (left), NANOG (red, middle), and merged images with DAPI staining (blue, right) are shown. Scale bars represent 100  $\mu$ m. Note that CM ESCs were maintained on high-density feeder cells in the absence of bFGF or LIF even after ten passages, and it was lost on low-density feeders after four passages.

A

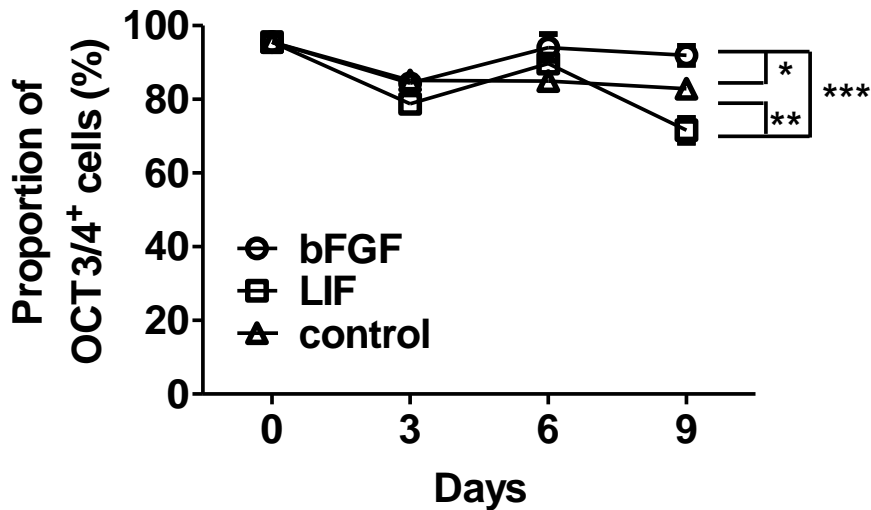

B

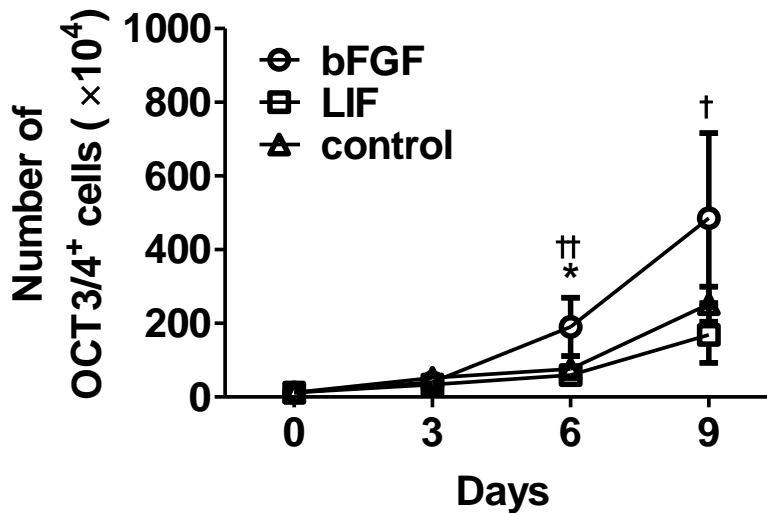

### Supplementary Fig. S2 bFGF promotes self-renewal of CM ESCs on feeder cells.

Cj11 cells ( $1.5 \times 10^5$ ) were seeded on MMC-treated MEFs and cultured with LIF (open square), bFGF (open circle), or without growth factors (open triangle). (A) The percentage of OCT3/4<sup>+</sup> cells was determined by FCM analysis. Data are shown as the mean  $\pm$  SD (n=4). One-way ANOVA followed by the Tukey's post-hoc test were used to test inter-group differences. \*P<0.05, \*\*P<0.01 and \*\*\*P<0.005. (B) Growth curves of OCT3/4<sup>+</sup> cells were generated by multiplying the number of live cells by the percentage of OCT3/4<sup>+</sup> cells and the passage ratio together. Data are shown as the mean  $\pm$  SD (n=4). One-way ANOVA followed by the Tukey's post-hoc test were used to test inter-group differences. \*P<0.05 (bFGF vs. control), †P<0.05 (bFGF vs. LIF) and ††P<0.01 (bFGF vs. LIF).

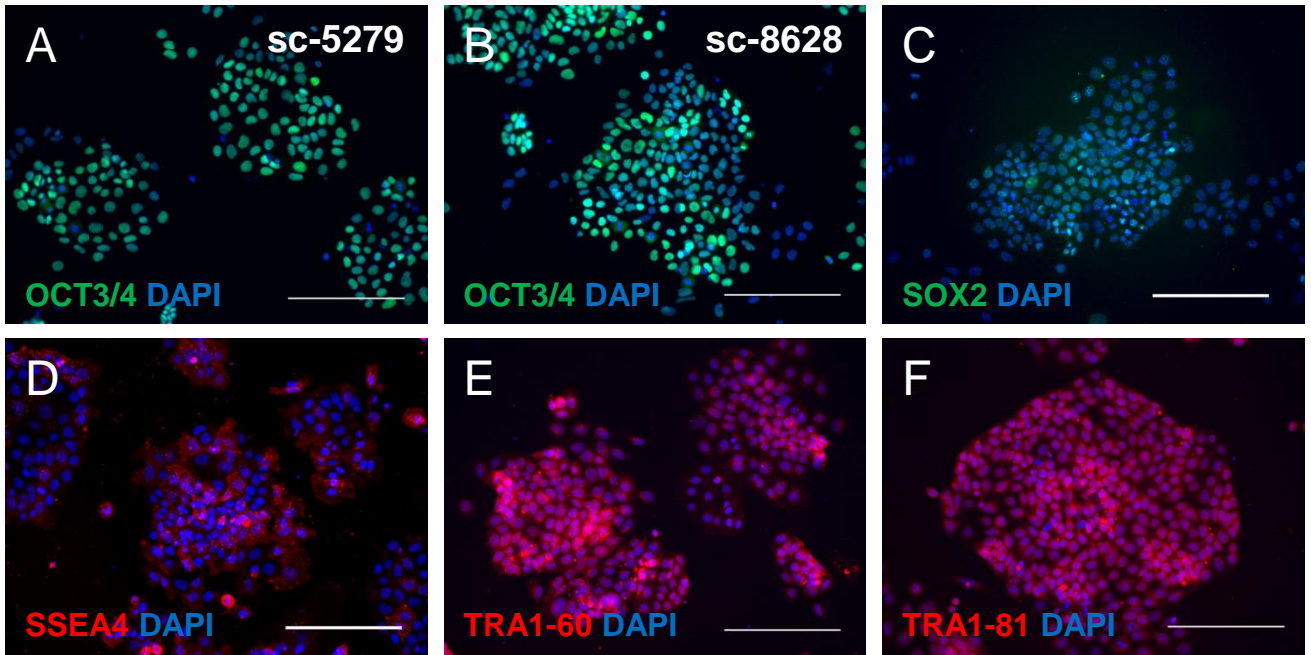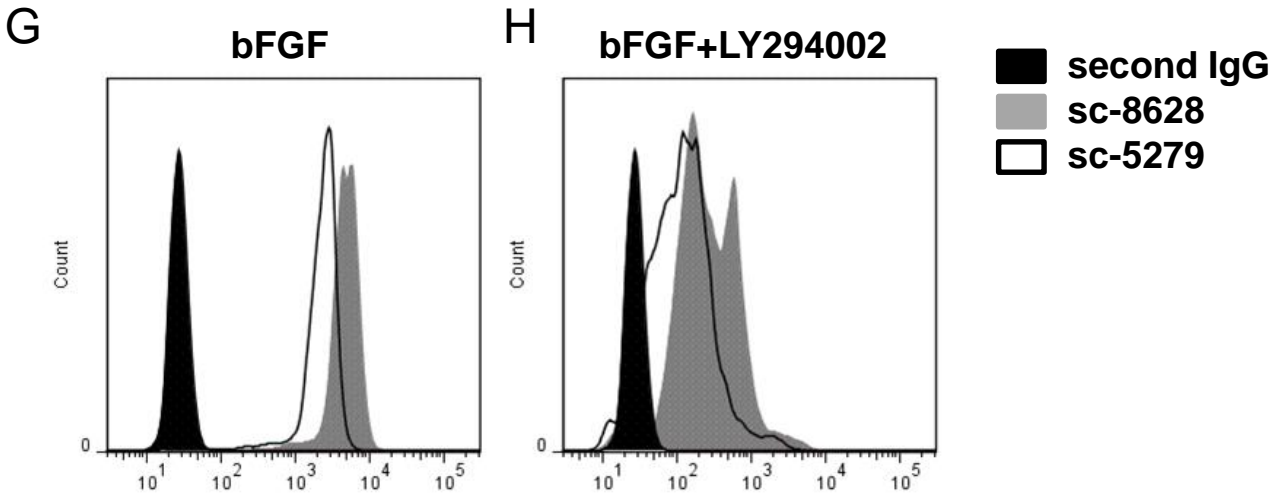

**Supplementary Fig. S3 CM ESCs cultured under feeder free condition expressed pluripotent stem cell markers.**

CM40 cells were cultured under feeder free condition for 4 days, and then cells were fixed and stained with OCT3/4 (A: sc-5279, B: sc-8628), SOX2 (C), SSEA4 (D), TRA1-60 (E) and TRA1-81 antibody (F). Scale bars represent 200  $\mu\text{m}$ . (G and H) CM40 cells were seeded on MMC-treated MEFs and cultured with bFGF (G) or bFGF+LY294002 (H) for 9 days. The percentage of OCT3/4<sup>+</sup> cells was determined by FCM analysis. sc-5279: bFGF,  $99.13 \pm 0.15\%$ ; bFGF+LY294002,  $46.87 \pm 2.78\%$ . sc-8628: bFGF,  $99.03 \pm 0.31\%$ ; bFGF+LY294002,  $50.90 \pm 2.26\%$ . mean  $\pm$  SD (n=3). Note that sc-5279 and sc-8628 were raised against amino acids 1-134 and 1-19 of human OCT3/4, respectively.

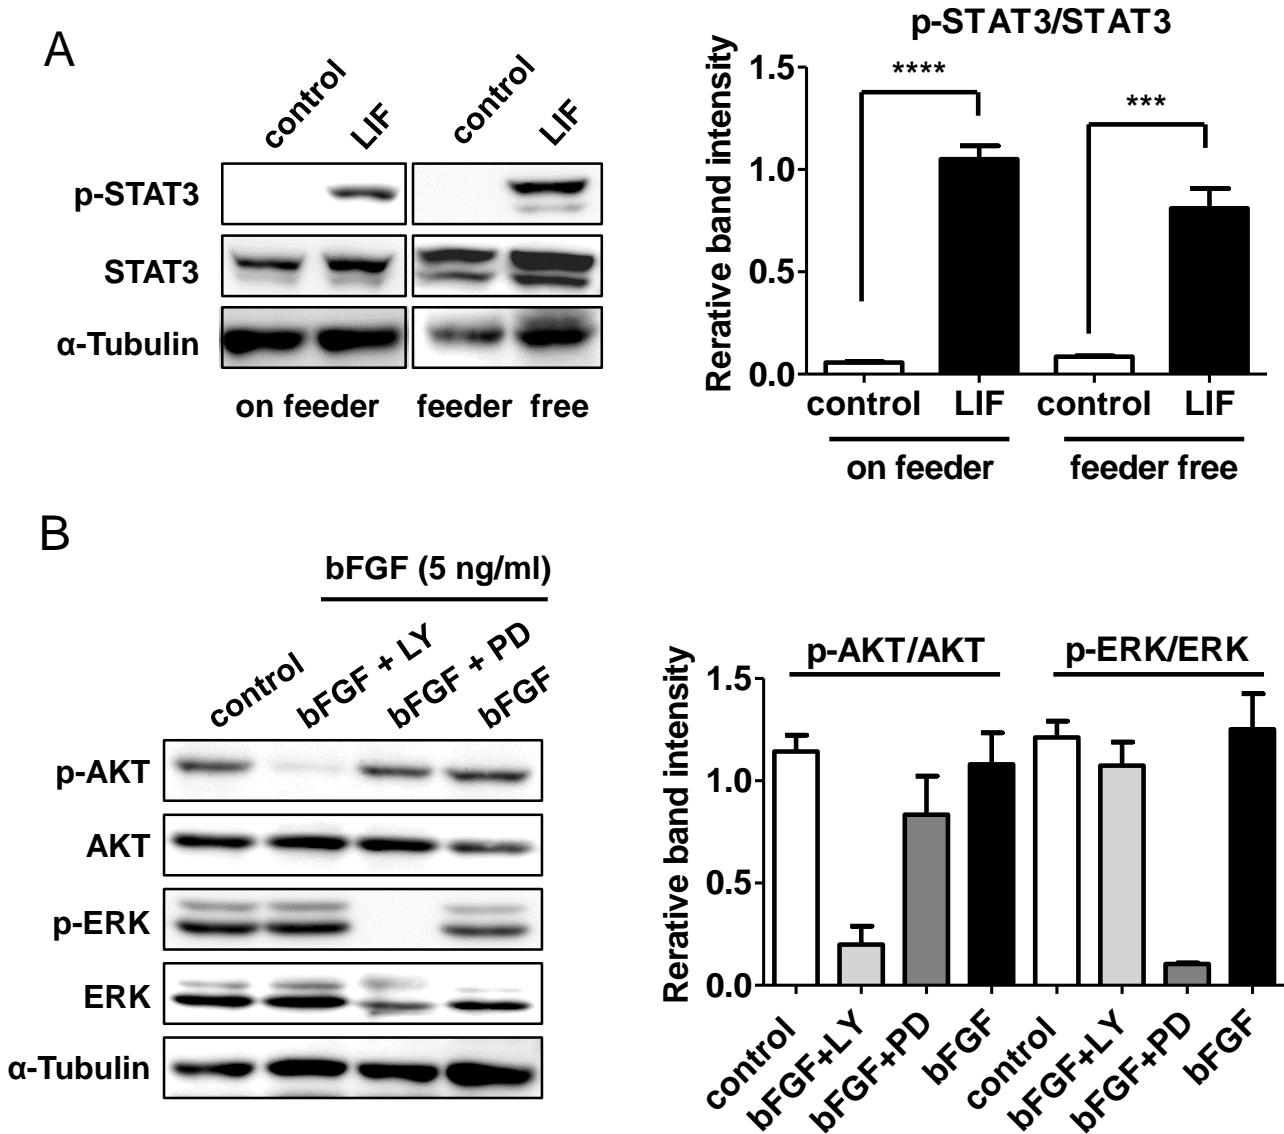

**Supplementary Fig. S4 LIF activates the JAK-STAT3 pathway in CM ESCs.**

Western blot showing the activation of STAT3 (A), AKT and ERK1/2 (B). (A) CM40 cells cultured on MEF feeders or under feeder free condition were starved of KSR overnight, and stimulated with LIF for 30 min. (B) CM40 cells cultured under feeder free condition were starved of KSR overnight, and stimulated with 5 ng/ml of bFGF for 30 min. The cells were pre-treated with LY294002 or PD0325901 for 1 h before stimulation with bFGF. Equal amounts of whole cell extracts were analyzed by Western blotting. STAT3, AKT, ERK1/2 and  $\alpha$ -Tubulin were used as loading controls. Band intensities were measured by ImageJ software. The relative band intensity of p-STAT3/STAT3, p-AKT/AKT and p-ERK/ERK are shown in right panels. Data are shown as the mean  $\pm$  SD (n=3). The Student's t-test was used to test inter-group differences of (A). \*\*\*P<0.005, \*\*\*\*P<0.001. One-way ANOVA followed by the Tukey's post-hoc test was used to test inter-group differences of (B). \*\*P<0.01 and \*\*\*P<0.005.

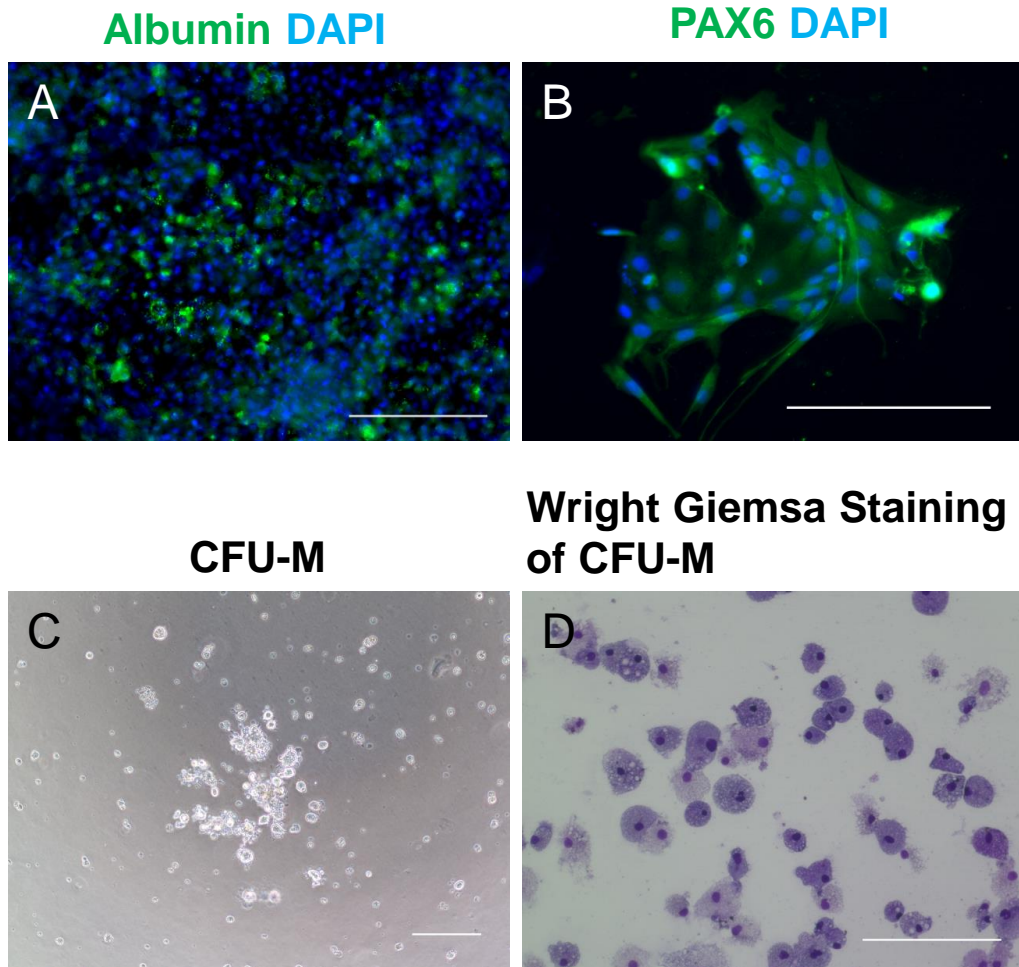

**Supplementary Fig. S5 CM ESCs cultured under feeder free condition maintained pluripotency.**

CM40 cells were cultured in CM ESC medium without bFGF on MEF feeders for more than ten passages, and then cultured under feeder free condition for four days. Then differentiation of the cells into three lineages was induced as described in Supplementary Materials and Methods. Then cells were stained with differentiation markers such as Albumin (A, hepatic cell marker, endoderm) and PAX6 (B, neuroepithelial cell marker, ectoderm). (C) Cells differentiated into hematopoietic cells showed the formation of colony forming unit-macrophage (CFU-M). (D) Wright Giemsa Staining of CFU-M. Scale bars represent 200  $\mu\text{m}$ .



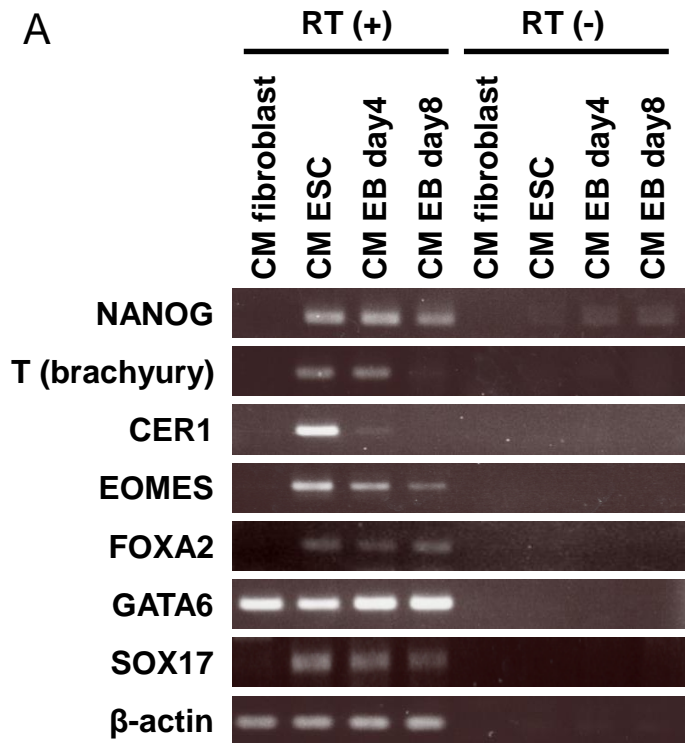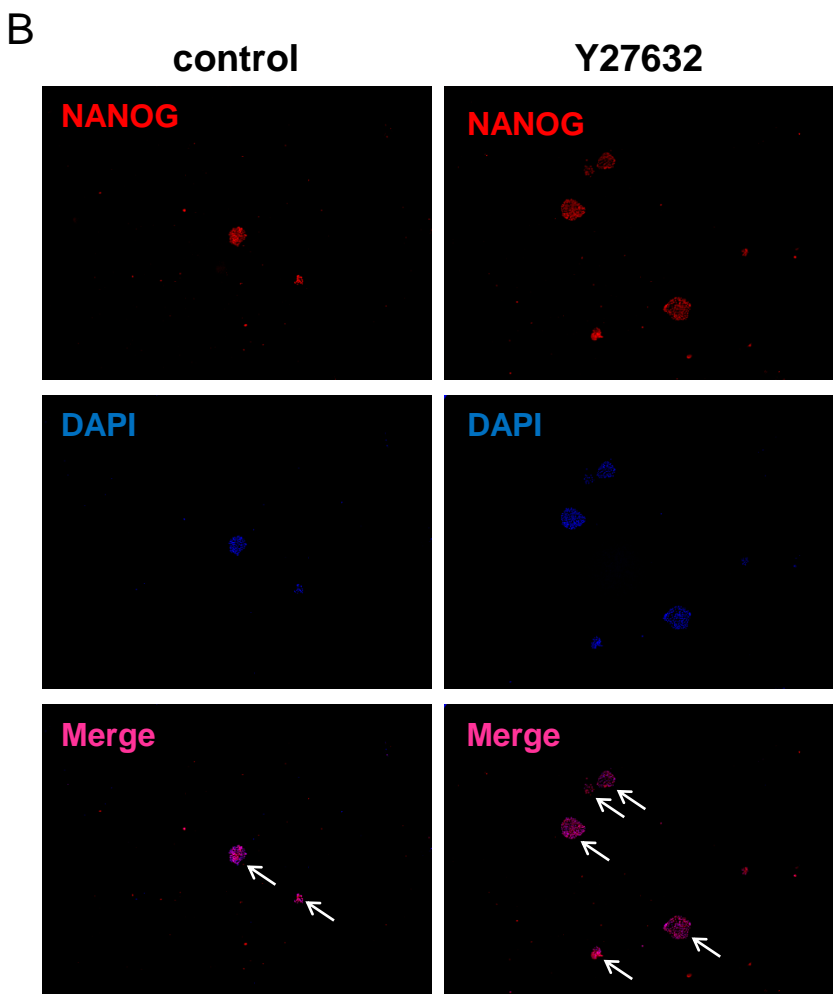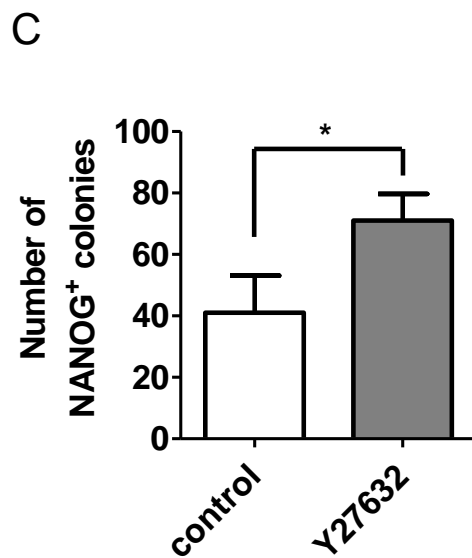

Supplementary Figure S6

**Supplementary Fig. S6 CM ESCs are phenotypically similar to human ESCs and mouse EpiSCs**

(A) Semi-quantitative RT-PCR analysis showing the expression of markers for human ESCs and mouse EpiSCs in CM fibroblasts, CM ESCs and CM ESC derived embryoid bodies (CM EBs). CM fibroblasts and CM EBs were used as controls. (B and C) Treatment with the ROCK inhibitor Y27632 significantly inhibited dissociation-induced apoptosis of CM ESCs. CM ESCs (CM40; 300 cells) cultured on feeder cells were trypsinized, and then CM ESC colonies were isolated by passing the cell suspension through a 40  $\mu$ m filter. CM ESCs were then completely dissociated by extensive pipetting, and the resulting single cell suspension was seeded on Matrigel-coated dishes and cultured in Essential 8 medium with or without 10  $\mu$ M Y27632 for 6 days. Live colonies were then fixed and stained for NANOG (red) and with DAPI (blue). White arrows indicate NANOG<sup>+</sup> colonies. Note that almost all of the colonies were positive for NANOG in Y27632-treated cultures and in the controls. Data are shown as the mean  $\pm$ SD. The Student's t-test was used to test inter-group differences. \*P<0.05.

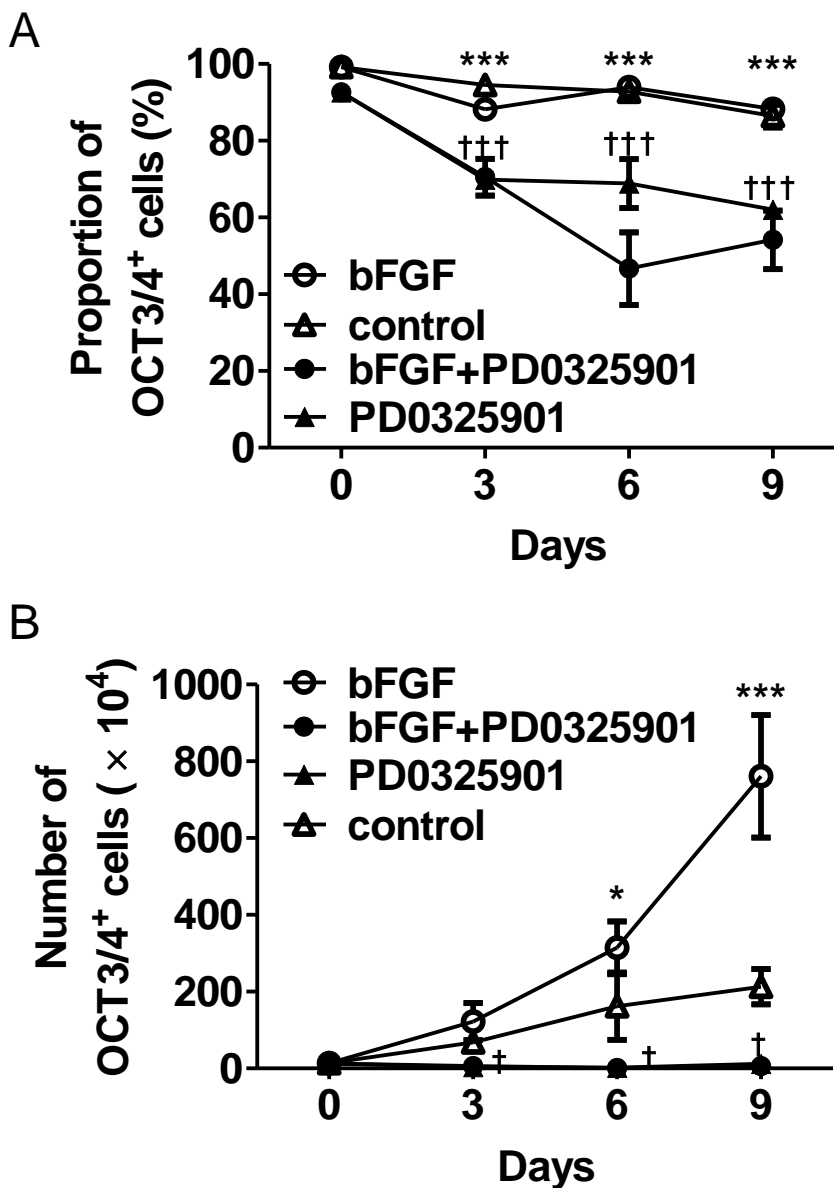

**Supplementary Fig. S7 MEK-ERK pathway is required for self-renewal of CM ESCs.** (A and B) CM40 cells ( $1.4 \times 10^5$ ) were seeded on MMC-treated MEFs and cultured in medium containing bFGF with or without a MEK inhibitor (PD0325901) (bFGF, open circle; control, open square; bFGF+PD0325901, closed circle; PD0325901, closed square). (A) The percentage of OCT3/4<sup>+</sup> cells was determined by FCM at the indicated days. Data are shown as the mean  $\pm$  SD. One-way ANOVA followed by the Tukey's post-hoc test was used to test inter-group differences. \*\*\* $P < 0.005$ , bFGF vs. control; ††† $P < 0.005$ , bFGF+ PD0325901 or PD0325901 vs. control. (B) The number of live cells was counted by trypan blue exclusion. Growth curves were generated by multiplying the number of live cells by the percentage of OCT3/4<sup>+</sup> cells and the passage ratio together. Data are shown as the mean  $\pm$  SD. One-way ANOVA followed by the Tukey's post-hoc test was used to test inter-group differences. \* $P < 0.05$ , \*\*\* $P < 0.005$ , bFGF vs. control; † $P < 0.05$ , bFGF+ PD0325901 or PD0325901 vs. control.

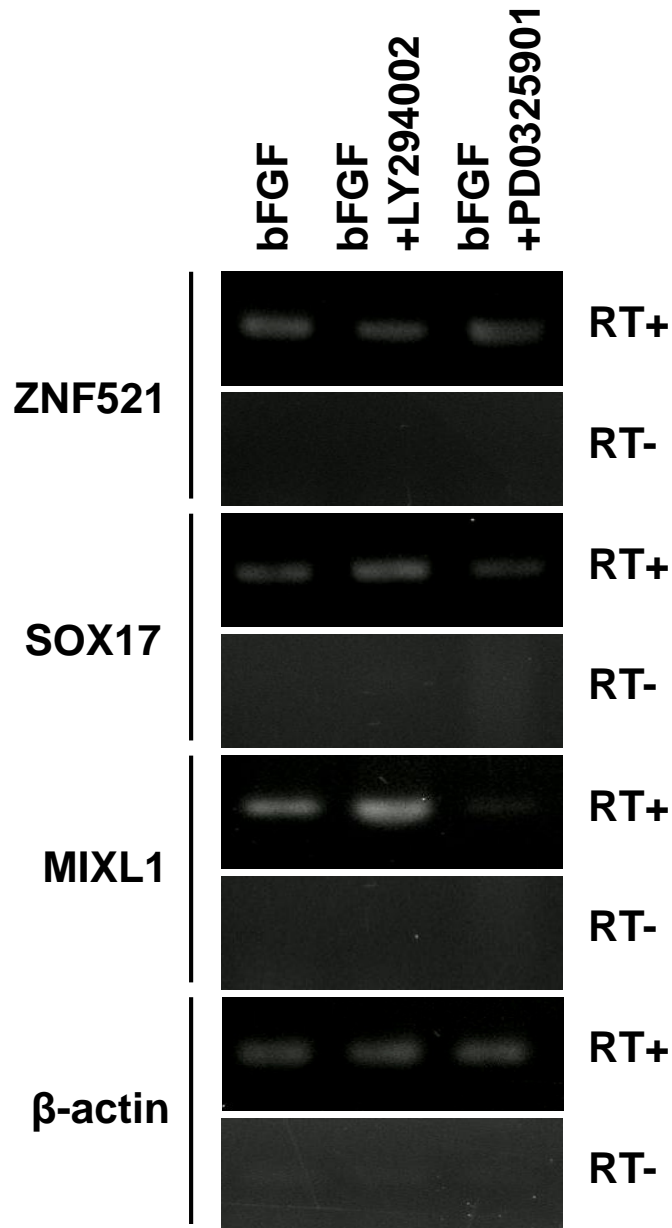

**Supplementary Fig. S8 Inhibition of PI3K or MEK affected the expression of germ layer specific genes in CM ESCs.**

CM40 cells were seeded on MMC-treated MEFs and cultured in medium containing bFGF with or without LY294002 or PD0325901 for 6 days. Then RNAs were extracted from the cells, and RT-PCR was performed using the primers for ZNF521 (ectoderm), SOX17 (endoderm) and MIXL1(mesoderm). Two independent experiments showed the similar results.  $\beta$ -actin was used as control.
